# Supplementary material for: Gene therapy-emulating small molecule treatments in cystic fibrosis airway epithelial cells and patients
Source: Respir Res. 2019 Dec 21;20:290. doi: 10.1186/s12931-019-1214-8 (PMC6925517; doi:10.1186/s12931-019-1214-8)
Supplement: Supplementary file 8 — Additional file 8. Genes down-regulated by both digitoxin treatment and gene therapy. [file 12931_2019_1214_MOESM8_ESM.xlsx]

## Sheet: Add file 8
Additional File 8
# Genes down-regulated by both digitoxin treatment and gene therapy.
Gene	S9vIB3_log2FC	S9vIB3_FDR	DIGvIB3_log2FC	DIGvIB3_FDR
AGA	-0.659	1.22e-07	-1.632	6.5e-46
SYNPO	-0.544	2.26e-08	-2.48	1.18e-185
AGT	-1.446	2.02e-11	-0.763	1.98e-05
ASS1	-1.777	4.3e-85	-2.033	3.47e-199
ZNF704	-1.883	1.14e-59	-0.586	4.64e-09
TMEM54	-0.59	1.89e-08	-0.678	3.84e-19
JRKL	-0.564	2.47e-08	-1.22	1.33e-54
XPC	-0.547	6.7e-08	-1.564	2.16e-45
ITGA1	-0.584	2.23e-06	-0.653	9.45e-11
ITGA4	-2.043	1.23e-25	-1.077	3.63e-12
MGST2	-6.141	1.53e-19	-0.67	0.000237
GPRASP2	-1.601	2.55e-47	-1.867	8.09e-77
GPRASP1	-1.416	1.36e-11	-0.873	1.45e-08
SDK1	-0.568	9.32e-07	-2.035	3.51e-56
FLJ33630	-0.523	6.37e-06	-1.961	6.44e-122
LOC80154	-0.788	2.81e-09	-1.624	3.05e-67
NDUFAF3	-0.584	1.23e-07	-0.905	1.73e-26
CYFIP2	-0.66	6.22e-16	-2.9	3e-86
C6orf48	-0.633	9.99e-07	-2.549	1.26e-129
TCEA1	-0.872	6.21e-09	-0.569	3.38e-07
SH2B3	-0.624	8.35e-07	-1.766	2.18e-146
EDA	-0.694	1.56e-08	-1.831	4.39e-34
CADPS2	-2.73	7.45e-52	-0.815	2.12e-12
CXXC5	-1.065	3.46e-10	-0.738	8.21e-10
KGFLP2	-0.571	0.00137	-0.872	0.000278
IFIH1	-1.093	2.68e-08	-1.134	3.69e-27
FOXO4	-0.635	2.39e-06	-1.146	8.49e-25
FYCO1	-0.577	1.63e-14	-0.807	2.84e-38
CLIP3	-1.738	7.44e-18	-1.057	1.35e-08
PRICKLE4	-0.548	0.000564	-3.475	1.23e-87
SASH1	-0.964	4.7e-17	-0.84	6.06e-20
EIF4E3	-0.951	5.6e-23	-0.719	6e-19
CFB	-1.941	8.9e-139	-1.228	2.91e-48
FAR2	-1.086	8.43e-15	-2.773	5.88e-64
SYTL4	-0.906	2.82e-23	-0.646	3.32e-15
PABPC1	-0.577	4.1e-10	-0.779	6.63e-66
CHI3L1	-1.284	1.11e-31	-1.393	1.16e-43
TRIM22	-0.678	0.00461	-1.67	6.2e-34
C15orf38	-0.518	2.44e-08	-3.372	0
PIK3CD	-0.857	2.67e-07	-0.82	5.45e-14
ESRP1	-3.128	1.17e-70	-3.991	1.01e-88
RELB	-1.008	6.36e-15	-0.767	1.05e-11
ZFP62	-0.548	7.57e-08	-0.666	1.06e-13
C3orf71	-0.595	9.36e-05	-0.61	1.25e-05
KLK1	-1.962	4.9e-08	-1.506	5.12e-06
PDE8B	-0.696	0.000807	-0.609	8.46e-05
RFX3	-1.178	1.41e-17	-1.746	1.49e-36
FLJ42709	-0.53	1.21e-07	-1.637	2.81e-70
FOXP2	-4.429	3.93e-15	-2.586	4.48e-14
FOXP1	-0.962	1.33e-20	-1.056	5.29e-35
SAA4	-2.346	6.93e-09	-1.959	1.53e-07
SAA2	-3.195	7.37e-59	-1.11	1.06e-29
ZNF599	-0.654	8.04e-07	-2.04	8.22e-41
NUDT1	-0.627	3.3e-08	-0.64	2.13e-14
C11orf9	-1.345	1.05e-36	-0.673	6.88e-27
IGFBP4	-0.641	1.34e-09	-0.741	5.69e-21
CYP2R1	-4.58	6.67e-81	-2.956	2.83e-94
STK32A	-4.542	3.94e-17	-4.608	2.89e-27
GLYCTK	-0.634	1.01e-09	-2.068	3.1e-78
COX19	-0.63	2.2e-15	-0.859	1.55e-34
SHISA3	-2.321	2.47e-24	-1.829	2.83e-22
TMEM218	-0.958	5.87e-31	-1.207	6.98e-56
GAS5	-0.665	3.83e-07	-2.618	2.68e-150
GTPBP2	-1.288	5.7e-19	-2.357	8.08e-89
CIB2	-2.486	3.84e-27	-2.123	3.99e-28
TGFBR2	-1.015	4.38e-47	-1.431	1.58e-243
CELSR1	-0.607	1.11e-06	-1.165	1.9e-37
TMED10P1	-0.721	1.95e-06	-0.817	5.45e-12
TATDN2	-0.808	3.99e-43	-0.609	5.56e-30
ST6GAL1	-1.128	3.01e-10	-2.846	1.17e-195
CLGN	-2.739	2.26e-41	-2.235	3.16e-119
ZMAT5	-0.649	4.77e-09	-0.547	1.38e-11
LOC388152	-0.555	1.92e-08	-1.62	6.57e-83
SERPINA3	-1.093	1.37e-07	-2.459	7.13e-27
FYN	-3.235	0	-1.066	6.26e-71
PCLO	-0.593	0.00345	-1.66	1.79e-41
RAC3	-1.41	7.98e-39	-1.683	2.57e-55
ST3GAL5	-0.786	1.69e-09	-1.114	1.5e-41
SLC16A9	-0.768	2.73e-06	-1.777	1.76e-30
ARHGAP32	-0.793	3.63e-11	-1.207	1.23e-36
THRB	-0.7	0.000233	-0.523	0.00718
HOXD8	-3.181	3.48e-29	-2.021	4.86e-13
HOXD9	-2.57	1.4e-14	-1.687	5.2e-11
FLRT2	-1.621	1.47e-33	-1.254	8.54e-21
SLC15A3	-2.569	7.45e-18	-1.623	1.15e-12
PTPN13	-4.776	4.2e-106	-1.521	1.5e-46
LOC100192378	-4.031	7.15e-14	-1.087	1.69e-05
CH25H	-3.241	9.07e-50	-1.863	1.41e-46
GAB2	-1.095	1.15e-19	-1.463	1.44e-31
ZNF853	-1.37	9.83e-25	-3.952	9.74e-113
EGR1	-1.687	4.59e-09	-3.04	2.05e-111
KIF7	-0.621	0.000466	-0.663	2.51e-06
CX3CL1	-4.182	1.91e-43	-3.669	1.21e-52
FAM86C	-0.521	1.04e-07	-3.553	1.44e-126
LRCH2	-1.706	5.5e-20	-0.616	1.57e-05
RTKN	-1.302	4.02e-18	-0.849	1.42e-11
RPS6	-0.793	1.31e-15	-1.597	1.36e-106
ADAMTS17	-1.524	2.41e-18	-0.562	5.34e-05
DHX58	-1.002	1.65e-09	-3.122	5.37e-73
GALNTL1	-1.037	8.1e-10	-2.644	2.41e-38
FBXO48	-0.556	0.004	-0.679	2.26e-05
DET1	-0.544	3.96e-07	-3.768	7.97e-132
GALM	-1.292	8.59e-10	-2.016	1.28e-20
PIR	-0.625	0.000137	-2.755	1.39e-127
RMND5B	-0.523	5.73e-07	-0.561	3.53e-11
RPSA	-1.125	1.52e-36	-0.924	6.99e-51
RPS6KC1	-0.539	1.1e-07	-1.381	3.85e-26
IDO1	-3.27	7.57e-15	-1.31	1.76e-06
LRRC29	-0.715	0.000236	-2.742	1.22e-30
C1orf97	-0.64	0.000955	-2.184	2.49e-45
NAP1L5	-5.305	2.12e-18	-1.538	2.46e-21
RGS7	-0.684	4.61e-05	-0.763	5.65e-09
ATG7	-0.571	2.04e-16	-1.255	1.92e-92
RGS3	-1.345	9.58e-57	-3.048	4.75e-254
UBXN2B	-0.533	2.65e-05	-0.703	1.31e-10
C13orf31	-0.739	0.000334	-0.8	6.32e-06
OASL	-2.161	1.02e-124	-1	6.68e-103
TMEM194B	-0.668	2.09e-10	-1.755	1.35e-90
ARAP2	-1.527	1.17e-16	-0.706	2.22e-07
SRRM3	-2.108	1.8e-30	-2.121	1.15e-40
RGL1	-1.078	2.05e-15	-1.105	9.05e-28
COL6A1	-0.819	1.78e-11	-1.339	3.21e-39
COL6A2	-0.536	0.000819	-1.363	1.09e-24
PECR	-0.986	4.05e-23	-0.675	2.47e-17
ZFAND1	-0.682	4.5e-11	-1.143	2.06e-32
OGG1	-0.758	5.15e-16	-0.679	3.98e-21
STON1	-0.947	6.02e-11	-1.208	2.82e-21
DDIT3	-1.01	5.02e-80	-2.159	0
RBP1	-3.002	3.71e-15	-3.06	1.17e-17
RBP7	-0.783	0.00776	-1.352	9.11e-07
EGFL7	-1.293	1.83e-17	-0.847	7.29e-11
TERF1	-0.524	0.000493	-0.586	3.46e-07
RPL9	-1.104	6.11e-38	-1.105	8.01e-59
HR	-1.038	2.48e-21	-0.81	2.75e-20
HP	-4.14	3.26e-10	-3.159	8.61e-22
NCKAP5	-2.33	2.35e-36	-1.001	4.81e-10
MRP63	-0.578	1.66e-10	-0.622	2.3e-13
GPRC5C	-0.989	1.29e-09	-0.536	3.13e-09
ZNF821	-0.561	0.000142	-2.368	3.4e-53
SUV420H1	-0.791	6.09e-26	-1.058	2.06e-67
ABCG1	-3.742	3.51e-53	-0.631	4.91e-07
RNF128	-5.195	1.14e-15	-1.543	1.57e-20
IL17RD	-0.789	1.95e-13	-2.085	3.59e-66
MAPK11	-0.979	7.87e-25	-1.057	4.29e-34
LOC100286793	-0.874	1.2e-08	-0.758	4.22e-14
ZNF620	-1.567	7.7e-26	-1.006	4.19e-19
FAM49A	-2.473	7.78e-12	-0.732	0.00312
PLCD1	-1.962	4.91e-41	-2.079	7.98e-67
HIST1H1E	-1.087	0.00546	-1.166	0.000757
SERPINA1	-0.559	8.79e-05	-2.053	2.63e-58
ITFG3	-0.524	7.9e-07	-1.925	4.36e-69
GJC2	-1.565	3.88e-08	-0.673	0.00115
LPXN	-0.657	0.00215	-2.42	1.04e-38
P2RX4	-0.905	9.05e-25	-0.607	8.68e-14
TRAF1	-0.807	1.65e-06	-4.153	8.25e-37
TMEM169	-1.683	2.63e-20	-3.914	2.16e-45
NICN1	-0.996	7.45e-14	-1.461	4.57e-36
PCDH1	-1.059	1.09e-31	-1.535	2.07e-50
RPL32	-0.613	2.97e-07	-0.598	7.31e-13
ZNF467	-0.825	0.0017	-3.598	4.23e-23
SAMD12	-0.866	8.99e-08	-0.768	1.75e-10
METTL12	-1.118	1.07e-23	-1.886	7.33e-52
BCAT1	-2.126	6.62e-46	-1.713	2.87e-54
STK3	-0.87	8.16e-22	-0.925	9.59e-22
CXCL10	-3.459	6.73e-31	-3.237	1.43e-39
FAM20A	-5.791	7.73e-52	-5.204	5.19e-112
CD1D	-1.591	2.16e-22	-0.655	6.42e-11
BCDIN3D	-0.557	1.2e-05	-3.311	7.22e-107
TNFRSF9	-2.101	2.7e-17	-4.157	1.09e-26
CCL20	-2.892	1.11e-09	-1.898	2.75e-07
NMRAL1	-0.528	1.87e-06	-0.823	7.59e-19
C8orf47	-2.717	6.29e-17	-1.698	3.87e-11
PPARG	-1.1	6.48e-22	-1.131	4.47e-63
DNAJC4	-1.148	6.75e-18	-1.608	1.16e-37
EML2	-1.188	1.32e-33	-0.847	2.95e-29
CD14	-1.442	2.96e-11	-1.795	3.05e-24
NCRNA00182	-0.812	0.00151	-1.036	3.27e-06
SLC2A11	-0.544	3.81e-05	-1.382	8.38e-23
SLC2A10	-0.686	7.56e-08	-2.922	2.19e-200
RNF150	-1.4	6.2e-26	-1.774	1e-39
ENHO	-0.605	4.68e-05	-2.381	5.22e-36
PLCG2	-1.104	4.83e-29	-0.965	4.72e-26
HAND2	-2.928	6.58e-41	-0.669	2.79e-07
CTSO	-1.378	3.77e-08	-1.52	6.96e-14
NLGN4Y	-1.31	5.32e-08	-2.296	8.24e-23
FBN2	-1.164	1.67e-41	-1.395	8.87e-91
LACTB2	-0.72	1.5e-08	-0.548	8.97e-07
SLC1A1	-2.21	5.72e-60	-1.428	9.98e-61
LIF	-0.723	8.21e-09	-1.236	5.53e-32
GAMT	-0.564	1.11e-05	-2.194	9.45e-95
PGCP	-3.544	7.23e-52	-0.952	5.17e-14
DHRS2	-0.931	3.23e-10	-2.55	5.03e-86
DHRS3	-1.127	1.48e-16	-2.85	5.08e-100
GMPR	-0.964	8.24e-07	-1.813	5.09e-23
CXCL1	-4.556	1.81e-105	-1.701	9.89e-61
DHRSX	-0.884	1.94e-19	-1.3	4.49e-49
DAAM2	-2.912	4.74e-126	-0.697	2.1e-10
CCDC152	-3.311	6.37e-34	-1.193	3.72e-19
NDUFA4L2	-0.578	5.78e-05	-2.728	2.03e-46
SYT1	-1.978	6.17e-32	-1.553	3e-23
CCL5	-2.03	2.27e-136	-1.341	2.51e-39
NCRNA00230B	-0.815	0.00492	-1.166	0.000314
GAD1	-0.685	7.64e-05	-0.562	0.00011
ENG	-0.664	0.0013	-0.6	0.00145
C1orf59	-4.89	2.22e-16	-1.845	2.86e-17
EXOG	-0.796	1.18e-16	-0.799	6.6e-20
PCDH18	-1.053	5.02e-16	-0.917	9.47e-27
C17orf101	-0.716	2.22e-11	-0.957	2.3e-25
TIGD2	-0.675	7.24e-09	-0.986	1.97e-21
HIST1H2BH	-0.83	0.00191	-0.66	0.00584
TTC28	-0.717	1.98e-11	-1.605	4.71e-51
NIPAL2	-1.01	2.18e-06	-2.971	9.98e-26
FGF12	-0.707	5.37e-05	-0.747	5.42e-06
FRY	-2.631	4.18e-267	-2.345	3.43e-213
NFKB2	-0.505	4.79e-09	-0.555	7.82e-14
HOXA7	-1.007	4.78e-12	-1.958	9.42e-49
OBSCN	-1.427	2.61e-24	-1.038	9.19e-12
ACCS	-1.724	2.11e-11	-2.178	2.55e-29
ANK3	-1.445	3.22e-13	-2.174	5.6e-47
SYBU	-1.024	4.24e-29	-1.647	7.23e-80
KBTBD11	-2.237	3.59e-45	-1.373	1.99e-29
FAM195B	-0.994	1.13e-23	-0.895	3.08e-21
ADD2	-1.073	2.37e-13	-0.983	8.61e-13
NUP210	-1.234	3.49e-58	-1.39	1.87e-89
LUC7L2	-0.611	8.26e-09	-0.842	8.88e-25
FAM131B	-0.905	4.32e-08	-3.161	2.05e-46
ZNF202	-1.017	2.36e-69	-0.771	7.28e-46
CASZ1	-0.686	2.63e-06	-1.085	9.41e-14
CCDC71	-0.522	7.16e-10	-1.353	6.01e-71
RPL15	-0.54	2.23e-07	-1.161	2.99e-77
TRPS1	-0.527	2.9e-05	-1.053	9.19e-22
RPL12	-0.617	3.74e-05	-1.575	6.64e-50
SETD5	-0.509	4.09e-08	-0.932	2.24e-46
NME4	-1.087	2.28e-20	-0.68	5.41e-14
CXCL3	-1.467	1.44e-08	-1.703	2.01e-09
TRANK1	-1.314	1.97e-17	-0.891	1.72e-20
ZNF524	-0.596	0.00146	-1.518	1.22e-23
AKNA	-1.885	7.59e-56	-3.236	2.17e-253
LOC285033	-0.558	0.00201	-1.226	2.34e-10
EPB41	-0.674	4.35e-22	-0.848	1.59e-42
RIN3	-0.55	1.86e-05	-2.348	1.6e-63
NT5E	-0.592	9.85e-15	-0.948	1.36e-42
IGSF9B	-0.951	2.11e-08	-0.828	2.37e-06
UNC5B	-3.894	3.05e-283	-1.695	1.16e-129
MED13L	-0.577	3.66e-06	-0.639	3.6e-14
ADAMTS2	-1.039	1.12e-16	-1.397	1.61e-32
AGFG2	-0.649	1.4e-10	-0.887	1.24e-32
CXCL2	-0.852	4.75e-07	-1.016	6.84e-12
SNED1	-0.829	6.09e-11	-1.759	2.29e-57
SDR42E1	-5.202	7.26e-44	-0.502	0.000259
NMNAT3	-0.87	0.000111	-2.77	2.4e-22
COCH	-5.449	2e-120	-1.272	6.05e-43
GPR64	-1.066	1.65e-26	-0.565	2.64e-11
MAST4	-1.277	4.01e-06	-1.776	2.38e-09
ADAM23	-3.165	2.09e-22	-1.435	1.78e-11
WNT6	-1.735	9.34e-06	-1.255	0.000501
IL6	-2.041	8.71e-74	-1.733	9.76e-118
FIS1	-0.608	3.89e-13	-1.138	2.48e-84
IL8	-3.508	1.52e-72	-1.739	2.02e-47
BIRC2	-0.807	3.24e-22	-0.611	2.95e-21
RBMS3	-0.601	0.000265	-1.336	2.43e-17
FBLL1	-3.183	4.48e-62	-2.695	2.43e-62
MKX	-2.225	3.47e-59	-1.464	1.09e-58
KLF15	-0.729	2e-07	-1.969	3.4e-53
PCDHGA11	-2.183	1.48e-85	-0.738	1.06e-18
MSI1	-0.944	2.68e-13	-0.96	1.59e-13
DUSP15	-2.758	6.3e-13	-4.048	1.34e-14
ProSAPiP1	-0.633	4.4e-06	-1.329	1.11e-22
SECISBP2	-0.594	1.69e-19	-1.9	4.06e-190
C1S	-2.218	6.7e-102	-1.878	4.21e-128
C1R	-1.114	3.27e-29	-1.458	5.82e-101
TIMP4	-6.458	3.93e-136	-2.165	7.77e-123
LOC100271722	-2.174	1.72e-28	-1.283	6.95e-15
BOC	-1.073	1.15e-08	-2.089	5.71e-26
SUSD4	-1.449	2.8e-17	-2.61	1.35e-32
MFAP3L	-0.979	2.55e-09	-1.185	6.58e-19
RNASEL	-0.503	0.000786	-1.739	1.66e-34
BRSK1	-0.51	0.002	-1.019	3.37e-15
ROBO1	-1.324	1.3e-39	-1.387	3.92e-76
ROBO3	-1.941	2.22e-63	-2.246	5.03e-123
ACTA2	-0.87	1.51e-21	-3.139	5.59e-228
CCDC69	-0.811	1.14e-11	-2.345	6.53e-103
SLC7A1	-0.729	6.92e-27	-0.633	6.03e-39
TMEM59L	-0.906	4.97e-18	-0.553	3.45e-08
LRRC61	-6.866	1.43e-21	-2.509	3.06e-64
NGLY1	-0.531	8.57e-08	-0.606	5.52e-18
BEX2	-2.146	1.08e-41	-0.719	4.04e-13
DLX4	-0.834	0.000228	-2.788	2.14e-21
TNFAIP3	-1.824	6.52e-32	-0.686	6.99e-11
PDZD4	-1.331	2.23e-11	-2.742	5.85e-25
MYNN	-0.618	3.58e-12	-0.501	1.55e-11
GGT5	-0.691	1.75e-08	-2.493	2.43e-196
DUSP8	-0.853	0.000475	-0.822	1.59e-05
DUSP6	-0.985	2.77e-15	-0.559	1.14e-11
PDGFRB	-1.669	7.21e-15	-2.975	9.32e-32
SGPP2	-0.651	4.46e-07	-3.113	2.15e-79
YPEL2	-1.313	1.37e-11	-0.913	3.86e-12
PLOD1	-0.533	1.55e-07	-1.519	7.71e-126
USP18	-1.291	3.89e-32	-1.033	7.8e-21
ZBTB42	-0.598	9.61e-06	-2.256	1.66e-71
C1orf91	-0.717	3.84e-12	-1.173	9.04e-38
PCSK6	-1.732	1.38e-30	-0.742	9.42e-09
PCSK7	-0.652	1.55e-09	-1.098	1.43e-20
SEMA4G	-2.379	1e-44	-2.402	1.89e-40
CTAGE9	-1.162	2.41e-07	-0.694	4.19e-05
HBQ1	-2.812	1.84e-08	-1.729	0.000468
CTAGE4	-1.166	3.96e-09	-0.743	1.33e-08
C3orf18	-0.666	4.09e-09	-2.342	1.53e-99
SERP2	-4.397	3.77e-14	-2.348	2.28e-19
GALNT12	-2.001	1.02e-32	-2.309	1.39e-49
CYP4X1	-1.234	3.51e-20	-1.377	1.82e-32
RPSAP9	-0.991	2.9e-34	-0.854	2.39e-39
ZNF772	-0.59	3.01e-06	-0.56	0.000125
MGC45800	-1.649	4.22e-27	-0.677	2.24e-09
MMP19	-0.65	2.93e-10	-0.566	6.28e-10
TPK1	-1.66	1.02e-17	-0.849	1.12e-07
APOM	-0.758	0.0002	-1.668	2.28e-11
GDF15	-1.17	1.24e-14	-2.389	1.99e-72
CDKN2C	-0.651	6.31e-07	-1.11	2.39e-24
KCNK13	-2.338	3.47e-17	-0.92	1.11e-05
CCDC3	-0.947	6.66e-07	-2.099	2.76e-21
C7orf29	-4.982	5.18e-17	-0.619	0.000125
FBXO36	-0.816	1.63e-06	-1.628	1.49e-21
RECK	-0.723	1.47e-08	-0.655	5.29e-11
NAB2	-0.892	1.35e-25	-1.214	2e-70
KCTD14	-0.57	5.21e-06	-0.557	1.39e-17
COL2A1	-2.918	4.98e-28	-0.924	8.85e-07
PIK3AP1	-2.944	5.01e-64	-2.047	1.24e-50
HMBS	-0.558	1.69e-12	-1.841	1.61e-121
S100A8	-0.876	0.00114	-2.521	1.4e-17
ROGDI	-0.639	2.14e-06	-1.804	3.19e-37
TNKS1BP1	-0.636	9.31e-10	-0.576	2.51e-16
LEF1	-1.076	1.7e-14	-0.608	1.45e-07
GPR109A	-1.027	0.000207	-2.096	1.72e-16
PCDH20	-3.782	1.71e-87	-0.516	1.76e-06
EBAG9	-0.801	1.12e-18	-1.858	8.88e-83
IL32	-2.498	3.84e-58	-1.431	3.31e-30
ARSJ	-0.727	2.25e-15	-0.625	6.87e-23
MT3	-2.953	1.58e-09	-0.836	0.00869
C9orf93	-0.611	0.000528	-2.745	6.69e-76
CXCL11	-2.84	2.46e-24	-1.57	5.77e-14
CDH6	-4.84	4.83e-288	-0.819	4.15e-48
C10orf125	-0.592	2.29e-07	-2.049	4.1e-79
OPLAH	-0.602	0.000392	-0.829	1.56e-12
PLEKHA4	-0.754	1.38e-11	-1.322	2.19e-45
NGF	-1.395	2.72e-17	-1.433	1.15e-19
IFI27L2	-0.606	6.88e-07	-0.508	3.92e-07
TREM2	-1.048	1.48e-05	-3.565	1.93e-16
TRIB2	-0.758	3.3e-15	-0.76	1.79e-46
OSCAR	-2.461	2.18e-18	-4.267	3.7e-28
FAM129A	-4.844	6.9e-119	-2.963	1.18e-152
ZNF767	-0.688	1.31e-10	-0.806	3.81e-31
G0S2	-4.986	6.06e-43	-2.097	1e-30
NUPR1	-1.327	1.42e-30	-4.113	0
UBE2E2	-1.256	2.68e-24	-0.924	1.94e-20
ASTN2	-0.64	1.6e-08	-3.27	6.44e-109
SHF	-0.86	1.18e-05	-2.418	2.53e-26
PLA2G16	-1.934	9.25e-100	-1.06	5.4e-52
DNAH1	-0.902	0.000423	-0.873	1.26e-05
TNFSF13	-0.901	2.22e-14	-1.1	2.09e-26
TMEM130	-2.837	1.2e-114	-3.347	3.95e-239
TBC1D10A	-0.595	3.06e-06	-0.765	2.69e-13
AS3MT	-1.376	4.77e-19	-0.619	1.45e-07
AZI2	-0.736	3.4e-18	-1.585	1.55e-196
PION	-0.77	0.000729	-3.059	8.69e-31
CADM3	-3.827	7.53e-257	-0.855	1.7e-40
MERTK	-1.067	1.24e-07	-0.605	0.00206
TM6SF1	-0.986	1.18e-06	-0.693	3.22e-06
TBCEL	-0.573	2.8e-05	-0.845	1.73e-16
MEGF8	-0.509	2.21e-06	-1.999	6.02e-141
TSLP	-3.196	1.15e-32	-1.998	3.53e-23
IQGAP2	-3.898	1.17e-41	-1.764	1.07e-28
LPHN2	-3.78	4.33e-243	-0.623	1.62e-19
MTMR11	-0.596	1.49e-06	-0.812	3.79e-14
EVC2	-2.124	3.68e-55	-2.671	5.4e-82
IFIT2	-1.478	2.93e-06	-0.591	0.000147
CDC42EP1	-0.65	1.65e-07	-1.36	9.36e-25
C11orf61	-0.531	1.75e-06	-1.471	1.21e-38
MGAT3	-2.144	1.11e-24	-2.966	4.87e-53
SLC20A2	-0.584	2.08e-08	-1.32	8.66e-65
FEZ1	-4.257	5.3e-30	-0.788	7.29e-08
BOLA1	-0.802	1.09e-12	-1.356	4.76e-39
NDUFB9	-0.937	8.04e-25	-0.513	1.9e-09
SLC6A9	-1.547	2.16e-51	-3.98	3.89e-276
IL29	-2.204	2.4e-16	-2.321	1.01e-22
C11orf86	-0.991	0.00135	-2.469	2.01e-12
GPR37	-5.13	8.11e-33	-0.625	8.11e-08
JAK2	-0.722	5.27e-07	-0.58	1.17e-08
C4A	-1.028	4.66e-10	-1.175	1.28e-17
BRCA2	-0.812	2.16e-05	-1.151	6.66e-35
AHRR	-0.762	0.000137	-1.461	1.36e-16
ACOT2	-5.534	1.35e-23	-1.058	1.34e-14
SNHG7	-0.849	1.51e-11	-0.999	7.21e-22
SNHG6	-0.98	1.24e-25	-0.725	4.16e-18
BMPR2	-0.511	1.69e-08	-0.553	3.46e-13
GUCY1B3	-6.246	2.7e-23	-1.617	1.31e-31
SNHG8	-0.648	0.000213	-2.167	1.35e-92
CC2D1B	-0.591	4.88e-09	-1.17	1.17e-58
TNRC18	-0.515	0.000243	-0.531	5.66e-07
BICC1	-0.712	2.83e-14	-0.539	2.9e-11
SYT12	-2.349	7.49e-114	-1.984	1.49e-125
HOXB3	-0.616	0.000112	-0.703	6.54e-08
ARHGEF37	-1.087	2.21e-24	-2.014	1.7e-79
EPHB6	-1.284	1.23e-18	-2.005	1.19e-65
HOXB4	-0.608	0.00057	-0.854	6.65e-08
DDX60	-1.363	1.68e-18	-2.406	1.19e-124
GIMAP2	-1.138	0.000356	-2.992	1.21e-15
MRPS28	-0.834	5.61e-18	-1.527	4.12e-62
H19	-0.73	1.87e-06	-1.994	8.09e-87
RPSAP58	-1.033	8.92e-32	-0.858	6.96e-52
FGF21	-2.158	4.98e-101	-6.495	6.9e-214
YY2	-0.925	4.58e-06	-0.6	1e-05
ARNT2	-0.725	1.98e-07	-3.013	9.37e-197
CSAG2	-2.435	5.84e-15	-2.182	1.38e-14
MOXD1	-2.489	2.57e-25	-1.81	2.46e-18
MLLT3	-1.976	5.73e-26	-1.203	1.53e-19
UIMC1	-0.613	1.89e-16	-0.745	1.78e-24
STAC2	-1.656	1.74e-39	-2.057	1.69e-125
SLCO2A1	-1.06	1.49e-33	-2.745	7.95e-241
C8orf33	-1.851	1.9e-204	-0.533	8.7e-48
THTPA	-0.546	7.34e-06	-1.453	2.46e-62
C6orf130	-0.6	4.04e-14	-0.82	4.62e-24
MAN2B2	-0.55	1.3e-13	-0.859	2.3e-49
DARC	-3.674	4.12e-59	-1.861	1.12e-37
MRC2	-1.577	1.51e-65	-0.718	3.55e-16
OAS1	-1.59	1.34e-29	-2.184	1.14e-48
SIAE	-0.711	5.22e-21	-1.299	2.3e-80
OAS2	-1.84	2.51e-50	-1.895	1.38e-83
KLHL5	-0.61	4.38e-09	-1.015	5.63e-54
KLHL9	-0.635	8.97e-19	-0.792	1.06e-46
CSPG5	-1.047	7.57e-10	-0.607	3.74e-07
CCDC80	-1.248	2.1e-25	-1.393	1.29e-105
MAMDC4	-0.978	3.48e-06	-2.544	9.77e-38
RBPMS2	-1.077	4.38e-18	-1.087	1.2e-29
LOC728392	-1.194	6.73e-09	-0.702	7.15e-06
LZTS1	-0.807	4.12e-06	-1.793	3.06e-29
EFEMP2	-0.615	1.45e-08	-0.686	8.71e-17
NCOA1	-0.772	4.02e-13	-0.928	3.22e-29
LOC728743	-0.579	4.19e-05	-3.15	2.31e-60
ME3	-4.633	4.72e-20	-1.754	2.85e-20
DAGLA	-0.714	4.91e-14	-2.122	1.35e-137
PABPC3	-0.667	8.38e-07	-0.796	1.85e-11
LIMD2	-0.571	7.16e-06	-2.481	4.19e-93
SYNE1	-2.067	6.39e-27	-1.949	6.27e-43
KIF21B	-0.742	1.76e-14	-5.425	0
ZNF252	-1.37	2.43e-18	-1.083	2.08e-41
CNTNAP3	-0.703	4.3e-06	-0.697	2.02e-07
ODZ4	-2.519	7.67e-67	-3.473	3.87e-173
ODZ3	-1.577	6.99e-41	-1.75	4.63e-82
FIBIN	-2.978	3.32e-74	-3.16	2.14e-130
FAM149A	-3.295	5.04e-33	-3.081	6.47e-30
C7orf70	-0.675	6.04e-17	-0.907	5.33e-33
KCTD21	-0.608	2.25e-06	-2.015	3.4e-72
MAP7D2	-2.616	2.62e-150	-1.578	5.24e-111
SLC40A1	-4.604	2.82e-34	-0.854	1.72e-08
C1QTNF1	-3.257	3.89e-99	-1.303	6.03e-32
PTPRG	-0.871	5.15e-19	-1.07	1.4e-34
KCNT2	-5.39	5.15e-17	-2.802	6.99e-30
PTPRM	-1.1	3.76e-43	-1.097	1.34e-52
TTC39B	-1.645	6.09e-65	-1.231	1.17e-56
PGAP3	-0.507	1.96e-09	-1.704	2.01e-74
GPM6A	-2.382	3.28e-16	-1.79	1.84e-13
C6orf125	-0.582	1.38e-14	-0.807	1.32e-45
APBB2	-0.547	2.21e-10	-1.537	3e-85
PVRL4	-0.803	1.63e-05	-1.555	3.12e-32
GRB14	-2.306	1.16e-54	-1.211	7.47e-26
PRR15	-2.162	1.54e-36	-2.472	1.39e-52
TNFSF12	-0.615	0.00231	-2.003	1.3e-25
TNFSF10	-2.528	1.08e-18	-0.989	8.26e-09
RPL28	-0.547	0.00264	-1.55	2.61e-57
XRRA1	-0.692	4.26e-18	-0.736	2.98e-18
C12orf39	-1.75	4.54e-21	-1.369	6.24e-12
IFIT3	-1.415	1.02e-06	-0.704	6.99e-10
IFIT1	-1.844	1.26e-25	-0.747	2.27e-15
ZG16B	-2.38	1.12e-23	-2.509	5.62e-31
HMMR	-0.566	5.45e-10	-0.638	1.14e-09
PLXNC1	-2.481	1.54e-42	-0.948	1.46e-12
PRDM5	-2.554	1.07e-28	-0.738	1.65e-07
ANPEP	-4.885	8.62e-166	-2.023	1.56e-106
SLC4A2	-0.692	3.94e-15	-0.948	5.67e-46
RPS4Y1	-0.683	1.64e-14	-0.715	2.03e-34
RBM11	-1.357	5.71e-07	-1.389	3.69e-09
ARVCF	-0.599	1.59e-05	-1.107	5.72e-20
MXRA5	-3.433	1.32e-96	-1.293	4.67e-40
LOC100133991	-0.619	0.00172	-1.166	8.56e-08
IGSF3	-1.311	7.96e-29	-0.962	1.49e-50
RTP4	-2.867	3.23e-15	-1.961	1.12e-11
SLC37A2	-0.647	0.000139	-0.86	2.98e-07
LTBP1	-0.999	1.76e-13	-0.668	4.83e-08
DDX11L2	-1.035	3.31e-11	-0.72	2.42e-09
ST6GALNAC3	-1.282	9.45e-17	-2.947	6.21e-106
BEST1	-1.537	4e-06	-3.493	1.34e-40
BACE1	-0.552	6.12e-08	-1.337	9.28e-50
BACE2	-0.653	2.9e-10	-0.63	1.85e-13
DKK3	-0.815	1.22e-18	-1.714	1.63e-229
MAN1B1	-0.751	8.97e-19	-2.31	1.22e-136
NUDT22	-0.646	3.17e-08	-1.238	5.8e-46
NFE2L3	-1.82	6.67e-81	-0.615	2.89e-21
METTL7B	-0.943	2.53e-05	-2.319	9.21e-40
APOL6	-0.571	2.88e-06	-1.094	1.27e-36
IAH1	-5.917	7.68e-39	-0.773	2.86e-10
ALDH1L2	-6.337	1.17e-292	-3.164	4.14e-250
FAM164A	-0.649	0.000528	-0.827	2.18e-08
ELMO1	-1.738	3.13e-18	-1.531	1.92e-20
TCTA	-0.894	1.04e-41	-0.646	3.4e-20
ADAP1	-0.549	0.000616	-1.509	3.19e-16
CRELD2	-0.558	4.68e-05	-0.601	6.1e-08
CRELD1	-0.773	6.18e-12	-0.795	2.12e-17
KIAA1324L	-3.594	4.89e-51	-2.405	2.66e-50
TIRAP	-0.798	6.52e-15	-0.932	1.4e-22
JAM2	-1.948	1.92e-09	-1.1	0.000319
LOC221442	-1.016	1.93e-06	-1.192	4.89e-08
MRAS	-0.811	1.07e-07	-1.961	1.15e-29
TUBB2B	-1.365	4.28e-19	-1.554	1.02e-18
MAOB	-4.328	7.05e-165	-2.139	9.88e-142
PIWIL4	-0.552	0.00625	-0.828	6.59e-05
MGC72080	-0.679	7.83e-11	-0.606	5.81e-13
LOC388588	-1.934	1.14e-06	-2.392	6.05e-08
LRAT	-1.424	1.21e-20	-1.549	1.25e-26
LYSMD4	-0.715	9.53e-16	-0.685	5.48e-20
PLA2R1	-2.393	7.26e-126	-0.704	6.44e-23
CSTA	-1.232	1.92e-18	-2.504	5.64e-65
LAMP3	-2.911	5.78e-97	-0.587	4.06e-12
TCF25	-0.528	5.32e-06	-0.694	6e-13
CMC1	-0.67	4.09e-09	-1.552	1.22e-53
ALDH2	-2.716	3.97e-214	-2.883	0
LENG1	-0.998	2.16e-17	-1.683	6.27e-56
LOC100133985	-3.406	7.55e-13	-1.265	2.97e-06
BBC3	-0.809	1.24e-13	-1.617	2.68e-33
PRR4	-0.505	0.0046	-1.051	7.2e-10
GPR1	-0.712	0.00849	-1.234	1.66e-12
FAM181B	-1.859	2e-11	-1.592	1.1e-10
NOTCH3	-2.164	1.49e-66	-2.419	9.4e-87
CACNG7	-1.151	3.44e-06	-0.705	8.91e-05
C7orf50	-0.935	9.24e-10	-1.235	2.45e-26
RLN2	-1.248	0.00221	-1.073	0.00616
INHBE	-1.182	9.73e-41	-6.416	0
DMTF1	-0.509	0.000178	-0.693	7.99e-19
ETFDH	-0.657	7.95e-09	-0.708	1.52e-17
C9orf3	-1.089	4.08e-36	-0.77	4.5e-27
ROR2	-2.065	6.38e-45	-1.133	2.33e-33
IKBKB	-0.583	7.06e-17	-0.713	7.11e-28
BST2	-3.416	2.44e-122	-0.777	3.12e-18
DGCR11	-0.764	0.000114	-1.37	1.22e-12
NUDT17	-0.503	0.00194	-1.128	1.94e-16
PNMAL1	-6.341	2.17e-23	-1.298	5.28e-34
PARP8	-0.588	4.24e-06	-0.64	3.77e-11
OR2A9P	-1.617	9.78e-45	-2.838	6.14e-114
SUMF1	-0.824	4.93e-11	-3.178	8.73e-116
MAML2	-1.777	1.69e-47	-1.191	2.84e-22
ZFAND2B	-0.673	2.84e-12	-2.053	9.25e-116
ZFAND2A	-1.041	2.02e-38	-2.255	2.35e-181
FAM86D	-0.512	5.45e-11	-2.869	5.84e-84
GBP4	-3.512	8.49e-70	-2.89	1.1e-72
HERC5	-2.249	1.87e-57	-0.563	2.92e-08
HERC6	-0.656	0.000213	-0.825	5.83e-21
C19orf73	-0.602	0.00293	-2.286	1.06e-21
EDA2R	-3.236	3.07e-86	-0.971	5.17e-26
TNFRSF1B	-1.343	1.31e-09	-1.238	3.35e-10
DOCK10	-1.797	1.03e-43	-0.877	1.82e-16
SNX19	-0.901	2.63e-54	-0.695	7.81e-31
IFNB1	-2.564	3.14e-10	-3.528	3.81e-43
SLC8A1	-1.45	5.28e-52	-0.846	1.22e-21
LOC100128288	-0.769	0.00249	-1.074	8.44e-06
DDR2	-0.96	5.28e-08	-3.723	1.25e-173
LOC554202	-0.767	4.43e-13	-2.201	5.03e-95
MAP4K4	-0.53	3.47e-06	-0.776	9.3e-19
S100P	-1.915	1.17e-15	-1.764	6.26e-20
ZMYND15	-2.957	8.64e-44	-3.817	8.25e-49
MAP9	-1.714	2.05e-27	-1.045	1.88e-15
EXT1	-0.511	8.39e-12	-0.613	3.03e-28
NRG2	-1.142	1.48e-09	-2.582	1.37e-35
CYP4V2	-1.241	1.08e-09	-2.06	3.71e-30
HCFC2	-0.625	5.07e-06	-0.548	6.19e-07
MSH5	-0.529	0.000184	-0.887	7.75e-26
FAM124A	-2.217	6.6e-27	-0.903	5.66e-09
ZNF76	-0.642	2.77e-10	-2.394	3.88e-128
RPL22L1	-1.167	2.29e-33	-1.427	5.56e-67
SPINT1	-0.82	7.5e-12	-1.164	1.14e-49
TESK1	-0.527	3.37e-09	-1.45	5.89e-75
EHBP1L1	-0.587	1.17e-10	-1.152	2.5e-55
C7orf46	-0.819	1.42e-11	-1.536	7.05e-44
TSPAN7	-2.868	9.52e-21	-0.82	0.000123
PDGFA	-1.125	8.46e-20	-0.96	7.37e-29
CDKN2BAS	-0.74	4.47e-05	-0.725	2.9e-07
AP4S1	-0.52	0.000671	-0.616	1.77e-05
TSPAN31	-0.512	6.2e-08	-0.691	6.13e-21
C8orf83	-0.803	6.53e-06	-0.848	2.16e-12
LRRCC1	-0.574	9.04e-08	-1.411	2.79e-52
NCAM1	-2.199	1.81e-177	-0.59	7.71e-17
NCAM2	-6.216	3.46e-38	-1.55	1.17e-39
VLDLR	-0.677	2.66e-26	-1.047	2.67e-51
POLD4	-0.529	1.67e-06	-1.918	6.8e-105
TCEAL2	-2.841	9.82e-17	-1.914	1.1e-12
FAAH	-1.785	7.1e-15	-0.649	0.000149
NPEPL1	-0.508	0.000194	-2.499	1.54e-104
C5	-1.369	3.2e-10	-3.535	8.67e-28
TADA3	-0.582	6.15e-07	-0.913	2.9e-22
ANKAR	-0.988	9.44e-05	-0.826	0.000284
ASAM	-6.387	6.28e-19	-1.413	2.18e-42
MSC	-1.585	1.28e-24	-2.178	1.18e-48
ANKRD6	-0.529	0.00423	-2.455	2.85e-44
SMPDL3B	-0.674	5.34e-05	-0.704	2.51e-06
C1orf190	-0.688	0.000372	-1.502	2.3e-26
DISP1	-0.924	5.66e-08	-2.116	2.24e-54
PDGFC	-0.761	2.62e-12	-1.496	2.55e-76
ZBTB46	-0.964	5.09e-09	-1.462	2.58e-25
PDIA4	-0.567	1.69e-12	-1.112	3.22e-84
LRG1	-2.304	4.7e-13	-3.783	5.3e-23
ANKDD1A	-0.824	8.52e-06	-0.654	3.27e-05
C5orf55	-0.699	1.49e-08	-3.47	4.68e-103
